# Supplementary material for: Characterization of the Key Aroma Compounds in Three Truffle Varieties from China by Flavoromics Approach
Source: PubMed Central journal article supplement (PMC6767217; doi:10.3390/molecules24183305), 2019-09-11
Supplement: molecules-24-03305-s001.pdf [file molecules-24-03305-s001.pdf]

# Supplementary material

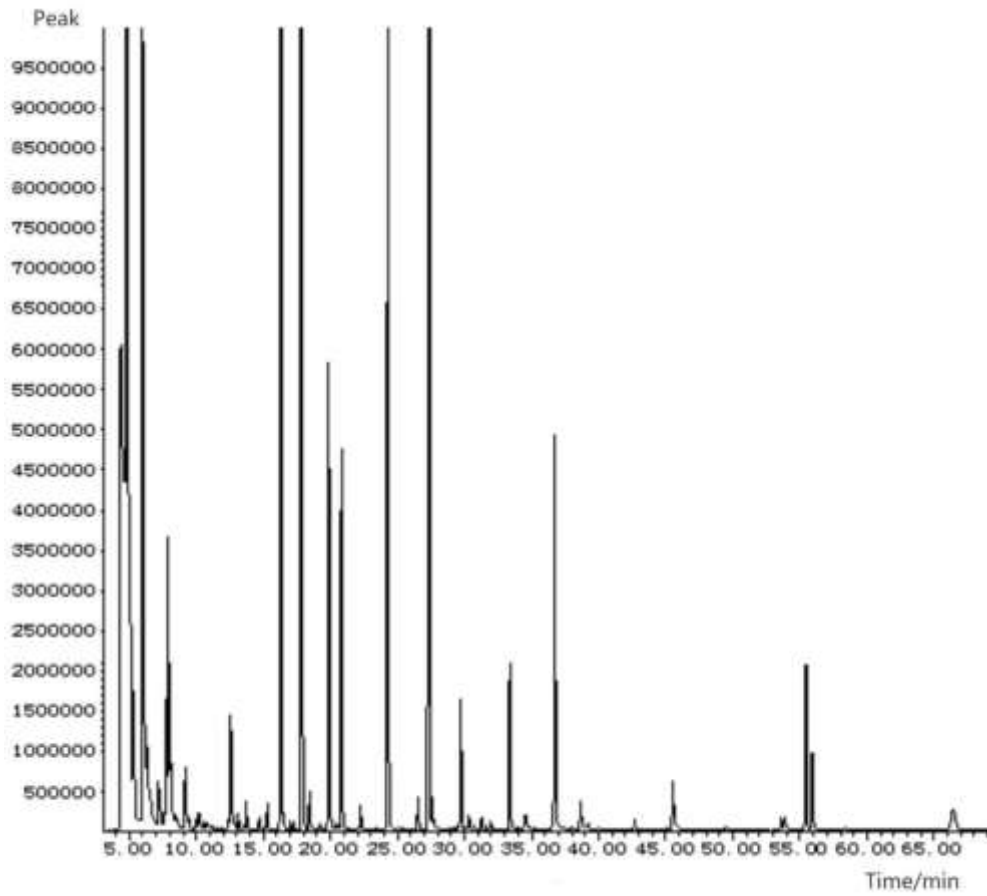

Fig 1. GC-MS chromatograms (T1 sample)

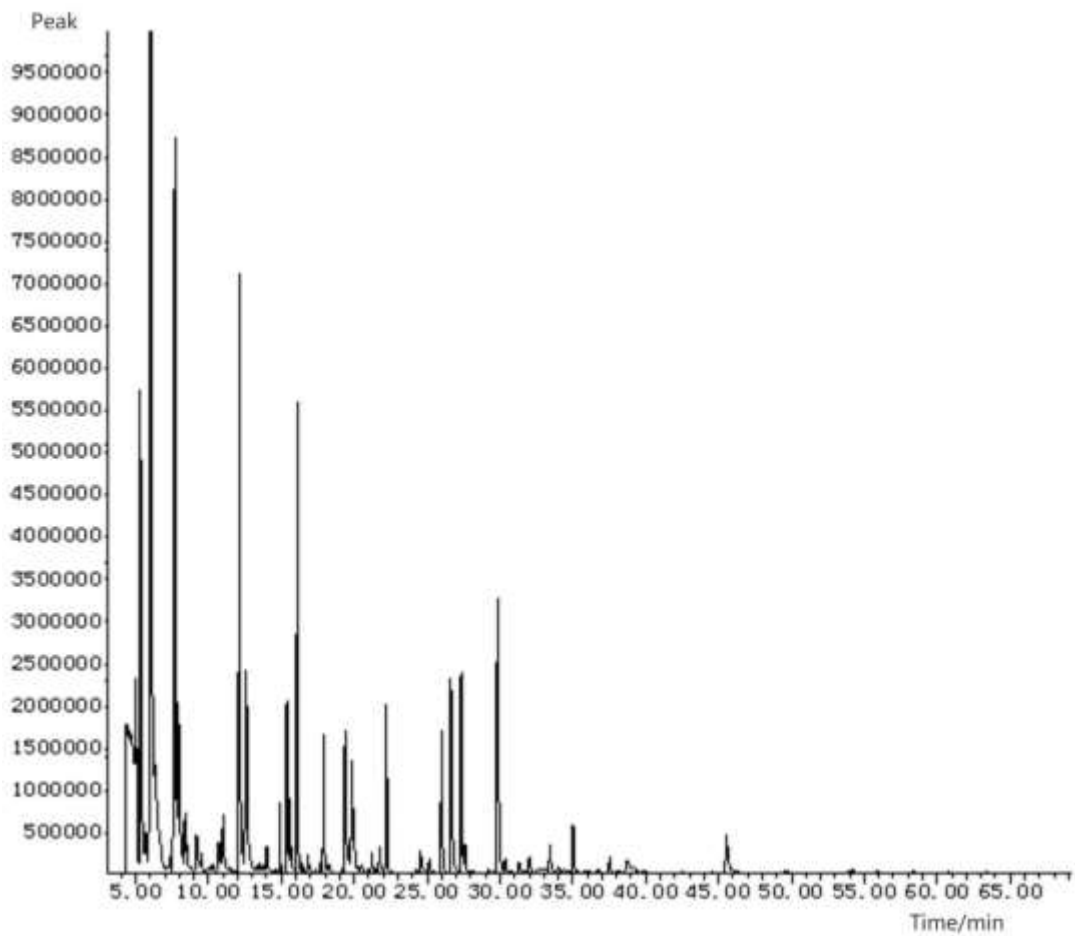

Fig 2. GC-MS chromatograms (T2 sample)

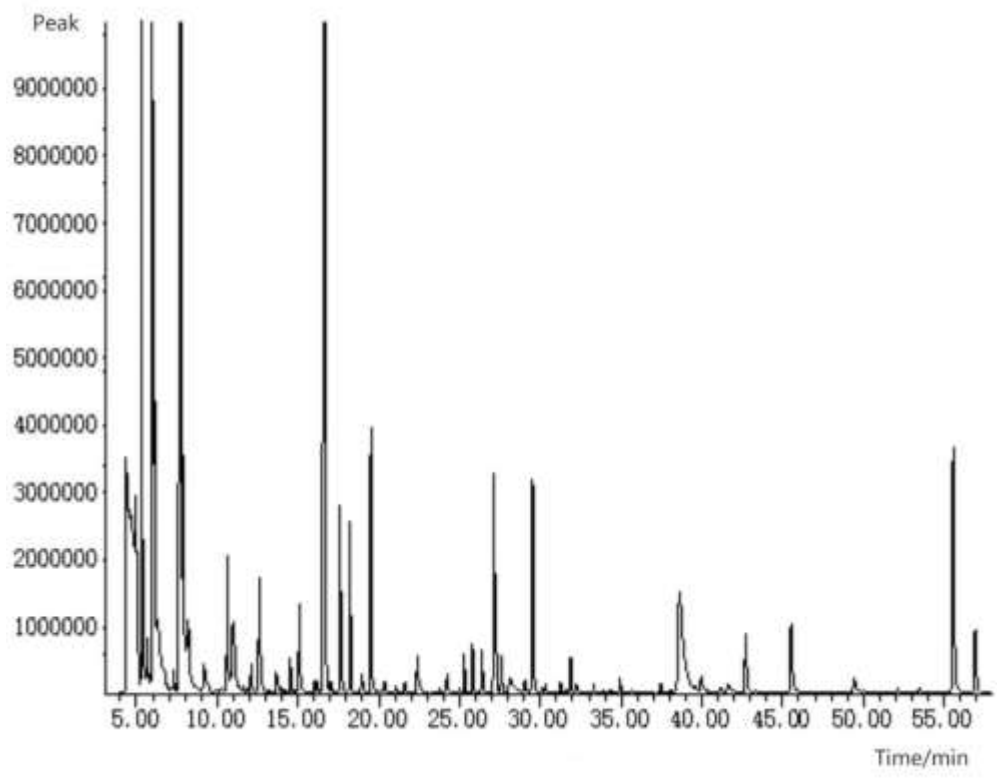

Fig 3. GC-MS chromatograms (T3 sample)
